# Supplementary material for: Activated carbons modified by magnesium oxide as highly efficient sorbents for acetone
Source: Royal Society of Chemistry journal article supplement (doi:10.1039/c7ra11740j), 2018-01-01
Supplement: c7ra11740j1.pdf [file c7ra11740j1.pdf]

## Supporting information

### Activated carbons modified by magnesium oxide as highly efficient sorbents for acetone

Ke Zhou <sup>a</sup>, Liqing Li <sup>a, \*</sup>, Xianchen Ma <sup>a</sup>, Yamian Mo <sup>a</sup>, Ruofei Chen <sup>a</sup>, Hailong  
Li <sup>a</sup>, Haoyang Li <sup>b</sup>

<sup>a</sup> School of Energy Science and Engineering, Central South University, Changsha  
410083, Hunan, China

<sup>b</sup> School of Materials Science and Engineering, Central South University, Changsha  
410083, Hunan, China

\* Corresponding author. Tel: +86 13807483619, E-mail address:

[liqingli@hotmail.com](mailto:liqingli@hotmail.com)

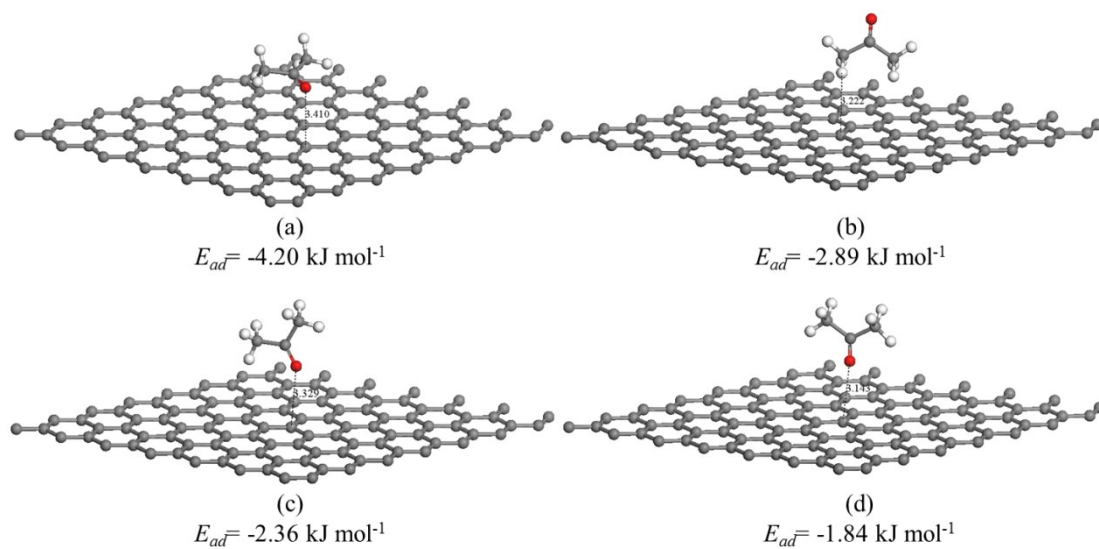

Figure S1. Molecular interaction of acetone with graphene surface.

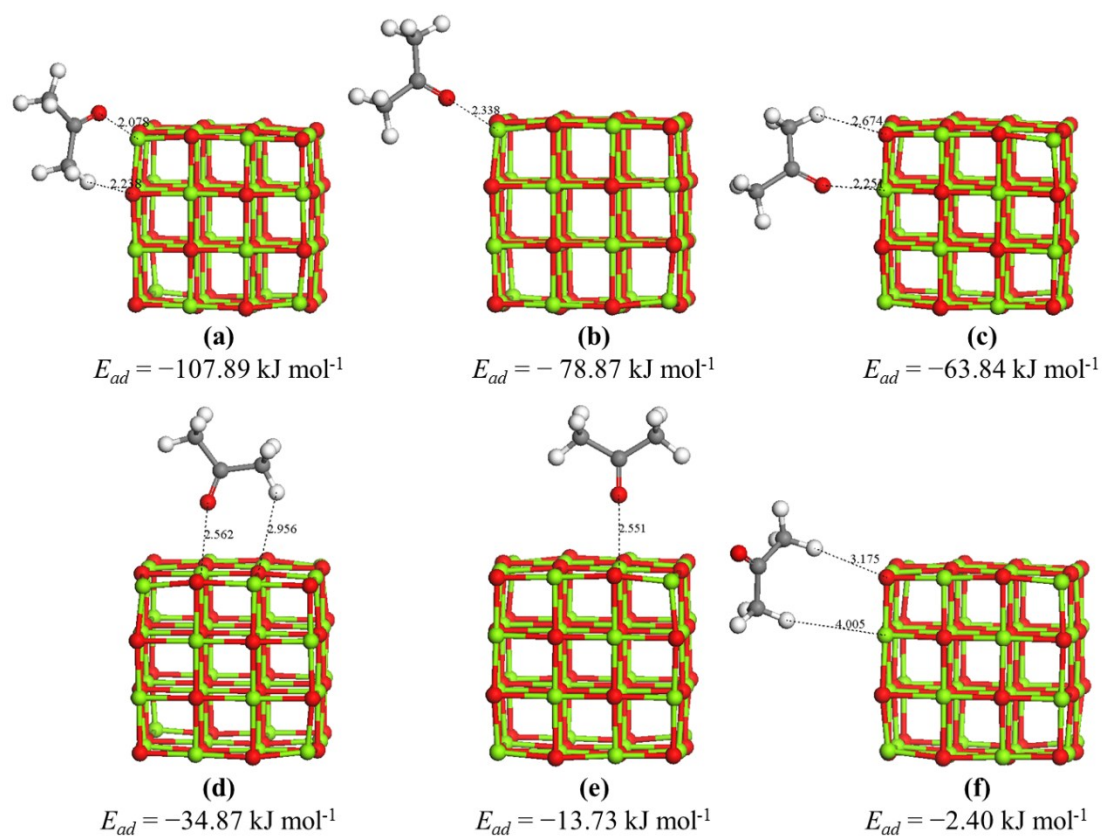

Figure S2. Molecular interaction of acetone with MgO surface.

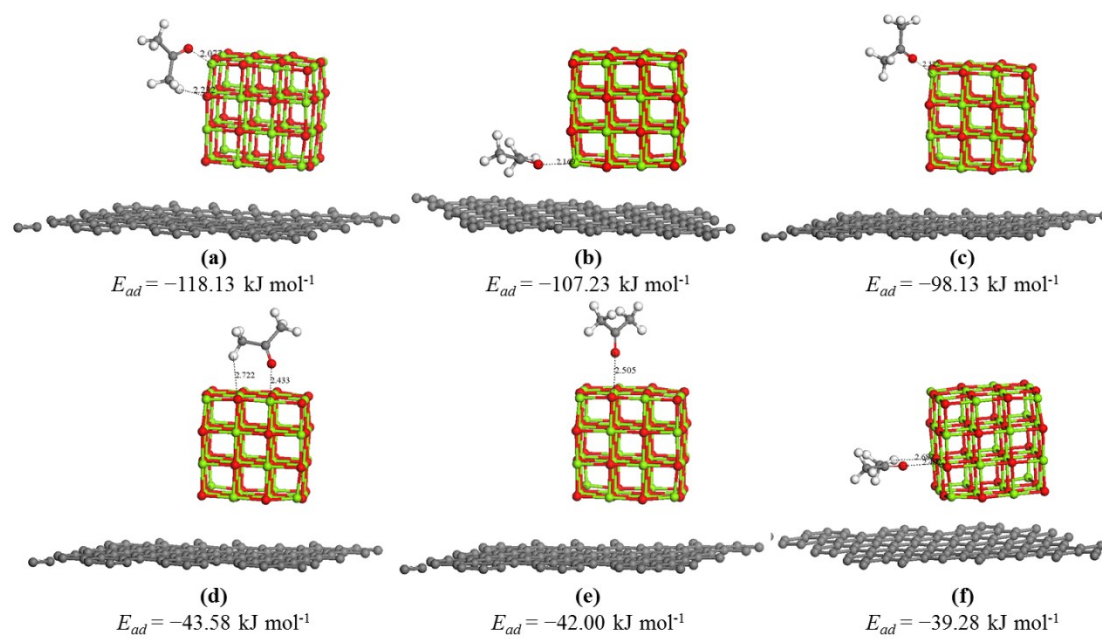

Figure S3. Molecular interaction of acetone with MgO/graphene surface.
